# Supplementary material for: Increased glycoprotein hormone yield in stably transfected CHO cells using human serum albumin signal peptide for beta-chains
Source: PeerJ. 2025 Feb 14;13:e18908. doi: 10.7717/peerj.18908 (PMC11831970; doi:10.7717/peerj.18908)
Supplement: Supplemental Information 2 [file peerj-13-18908-s002.xlsx]

## Sheet: FSH_1
		Dilution, ng/mL	OD1	OD2	Mean OD-blank	%RSD
		2.5	2.324	2.121	2.2225	0.0645861
		1.25	1.892	1.78	1.836	0.0431351
		0.625	1.201	1.11	1.1555	0.0556873
		0.3125	0.779	0.681	0.73	0.0949267
		0.15625	0.524	0.493	0.5085	0.0431078
		0.078125	0.376	0.326	0.351	0.100727
							1.25	0.23
	Day	Sample name	Solution	Dilution	OD 1	OD 2	Mean OD - blank	FSH, mkg/mL	FSH, mkg/mL	SD, mkg/mL	VCD, x1K/mL	% via	Norm. Vol. Prod, pg/cell	Norm. Vol. Prod, pg/cell
	0	FSH-NSP	1% BSA-PBS	10000	0.14	0.134	0.137	0	0	-0.0222971	311	0.95	0	0
	1	FSH-NSP	1% BSA-PBS	10000	0.371	0.415	0.393	1.128	1.48	0.0893006	762	0.97	1.48031	1.94226
	2	FSH-NSP	1% BSA-PBS	10000	0.949	1.08	1.0145	5.752	6.8	0.525198	1560	0.98	3.68718	4.35897
	3	FSH-NSP	1% BSA-PBS	10000	1.296	1.143	1.2195	8.528	7.304	0.756557	2880	0.98	2.96111	2.53611
	4	FSH-NSP	1% BSA-PBS	10000	1.442	1.485	1.4635	9.696	10.04	0.201444	3520	0.94	2.75455	0
	0	FSH-HSA	1% BSA-PBS	10000	0.127	0.126	0.1265	-0.824	-0.832	-0.00460598	293	0.96	0	-2.83959
	1	FSH-HSA	1% BSA-PBS	10000	0.42	0.448	0.434	1.52	1.744	0.0693421	622	0.98	2.44373	2.80386
	2	FSH-HSA	1% BSA-PBS	10000	0.751	0.714	0.7325	4.168	3.872	0.14887	1440	0.98	2.89444	2.68889
	3	FSH-HSA	1% BSA-PBS	10000	1.184	0.803	0.9935	7.632	4.584	2.06957	1740	0.97	4.38621	2.63448
	4	FSH-HSA	1% BSA-PBS	10000	1.429	1.375	1.402	9.592	9.16	0.26124	3140	0.96	3.05478	2.9172
	0	FSH-Azu	1% BSA-PBS	10000	0.124	0.13	0.127	-0.848	-0.8	-0.0283288	353	0.94	-2.40227	-2.26629
	1	FSH-Azu	1% BSA-PBS	10000	0.519	0.479	0.499	2.312	1.992	0.131049	997	0.97	2.31896	1.99799
	2	FSH-Azu	1% BSA-PBS	10000	1.19	1.19	1.19	7.68	7.68	0	1260	0.97	6.09524	6.09524
	3	FSH-Azu	1% BSA-PBS	10000	1.478	1.174	1.326	9.984	7.552	1.61853	1690	0.96	5.90769	4.46864
	4	FSH-Azu	1% BSA-PBS	10000	1.77	1.727	1.7485	12.32	11.976	0.214239	3670	0.95	3.35695	3.26322
	0	FSH-aSP	1% BSA-PBS	10000	0.125	0.142	0.1335	-0.84	-0.704	-0.0756366	410	0.95	-2.04878	-1.71707
	1	FSH-aSP	1% BSA-PBS	10000	0.25	0.301	0.2755	0.16	0.568	0.0209437	915	0.98	0.174863	0.620765
	2	FSH-aSP	1% BSA-PBS	10000	0.619	0.621	0.62	3.112	3.128	0.00709844	1920	0.99	1.62083	1.62917
	3	FSH-aSP	1% BSA-PBS	10000	1.382	1.307	1.3445	9.216	8.616	0.36352	3230	0.98	2.85325	2.66749
	4	FSH-aSP	1% BSA-PBS	10000	1.586	1.594	1.59	10.848	10.912	0.0385947	3730	0.95	2.90831	2.92547

## Sheet: FSH_2
		Dilution, ng/mL	OD1	OD2	Mean OD-blank	%RSD
		2.5	2.211	2.34	2.2755	0.0400865
		1.25	1.725	1.698	1.7115	0.0111551
		0.625	1.077	1.027	1.052	0.0336077
		0.3125	0.715	0.669	0.692	0.0470042
		0.15625	0.415	0.476	0.4455	0.0968205
		0.078125	0.215	0.241	0.228	0.080635
							1,21	0.16
	Day	Sample name	Solution	Dilution	OD 1	OD 2	FSH, mkg/mL	FSH, mkg/mL	FSH mean, mkg/mL	SD	VCD, x1K/mL	VCD, x1K/mL	% via	% via	Norm. Vol. Prod, pg/cell
	0	FSH-NSP	1% BSA-PBS	10000	0.093	0.122	0	-0.31405	0	0.169472	339	351	0.95	0.95	-0.9264
	1	FSH-NSP	1% BSA-PBS	10000	0.222	0.206	0.512397	0.380165	0.446281	0.0935017	1030	1130	0.97	0.97	0.369093
	2	FSH-NSP	1% BSA-PBS	10000	0.602	0.599	3.65289	3.6281	3.6405	0.0175316	1560	1480	0.95	0.96	2.3257
	3	FSH-NSP	1% BSA-PBS	10000	0.84	0.992	5.61983	6.87603	6.24793	0.888266	3860	3550	0.95	0.95	1.78136
	4	FSH-NSP	1% BSA-PBS	10000	0.813	1.012	5.39669	7.04132	6.21901	1.16293	5060	5210	0.96	0.94	1.39157
	0	FSH-HSA	1% BSA-PBS	10000	0.095	0.109	-0.53719	-0.421488	-0.479339	0.081814	292	276	0.93	0.94	-1.44345
	1	FSH-HSA	1% BSA-PBS	10000	0.257	0.243	0.801653	0.68595	0.743802	0.081814	679	711	0.96	0.95	1.01024
	2	FSH-HSA	1% BSA-PBS	10000	0.445	0.43	2.35537	2.2314	2.29339	0.0876579	1420	1270	0.94	0.94	1.57141
	3	FSH-HSA	1% BSA-PBS	10000	0.614	0.546	3.75207	3.19008	3.47107	0.397382	2580	2390	0.94	0.95	1.23647
	4	FSH-HSA	1% BSA-PBS	10000	0.731	0.808	4.71901	5.35537	5.03719	0.449977	4030	3870	0.94	0.95	1.32888
	0	FSH-Azu	1% BSA-PBS	10000	0.118	0.131	-0.347107	-0.239669	-0.293388	0.0759702	318	355	0.93	0.93	-0.753677
	1	FSH-Azu	1% BSA-PBS	10000	0.312	0.238	1.2562	0.644628	0.950413	0.432445	716	822	0.94	0.94	0.900319
	2	FSH-Azu	1% BSA-PBS	10000	0.45	0.409	2.39669	2.05785	2.22727	0.239598	1750	1490	0.98	0.98	1.17591
	3	FSH-Azu	1% BSA-PBS	10000	0.966	0.805	6.66116	5.33058	5.99587	0.940861	2500	2820	0.96	0.94	2.13223
	4	FSH-Azu	1% BSA-PBS	10000	1.324	1.281	9.61983	9.26446	9.44215	0.251286	4320	4540	0.97	0.95	2.14455
	0	FSH-aSP	1% BSA-PBS	10000	0.087	0.119	-0.603306	-0.338843	-0.471074	0.187003	411	391	0.94	0.94	-0.824435
	1	FSH-aSP	1% BSA-PBS	10000	0.172	0.152	0.0991736	-0.0661157	0.0165289	0.116877	923	944	0.95	0.95	-0.0716313
	2	FSH-aSP	1% BSA-PBS	10000	0.3	0.302	1.15702	1.17355	1.16529	0.0116877	1340	1540	0.96	0.98	0.875786
	3	FSH-aSP	1% BSA-PBS	10000	0.737	0.594	4.7686	3.58678	4.17769	0.835672	2110	2230	0.97	0.97	1.69989
	4	FSH-aSP	1% BSA-PBS	10000	0.858	0.802	5.7686	5.30579	5.53719	0.327256	3740	3510	0.96	0.95	1.41866

## Sheet: LH_1
		Dilution, ng/mL	OD1	OD2	Mean OD-blank	%RSD
		2	1.557	1.71	1.6335	0.0662304
		1	0.957	1.036	0.9965	0.0560576
		0.5	0.45	0.478	0.464	0.0426702
		0.25	0.297	0.315	0.306	0.0415945
		0.125	0.174	0.168	0.171	0.0248108
		0.0625	0.104	0.098	0.101	0.0420063
							0,93	0.0004
	Day	Sample name	Solution	Dilution	OD 1	OD 2	Mean - blank	LH, mkg/mL	LH, mkg/mL	SD, mkg/mL	VCD, x1K/mL	% via	Norm. Vol. Prod, pg/cell	Norm. Vol. Prod, pg/cell
	0	LH-NSP	1% BSA-PBS	10000	0.098	0.09	0.094	1.04946	0.963441	0.0631559	373	0.97	0	2.58295
	1	LH-NSP	1% BSA-PBS	10000	0.128	0.145	0.1365	0.974194	1.55484	0.0857919	762	0.98	1.27847	2.04047
	2	LH-NSP	1% BSA-PBS	10000	0.202	0.197	0.1995	1.65161	2.11398	0.0292698	1530	0.97	1.07949	1.38169
	3	LH-NSP	1% BSA-PBS	10000	0.362	0.34	0.351	3.28065	3.65161	0.145398	3090	0.97	1.0617	1.18175
	4	LH-NSP	1% BSA-PBS	10000	0.456	0.433	0.4445	4.28602	4.65161	0.156818	6070	0.98	0.706099	0.766328
	0	LH-HSA	1% BSA-PBS	10000	0.107	0.106	0.1065	0.651613	1.13548	0.00432638	369	0.91	1.76589	3.07719
	1	LH-HSA	1% BSA-PBS	10000	0.176	0.176	0.176	1.39892	1.88817	0	669	0.95	2.09107	2.82238
	2	LH-HSA	1% BSA-PBS	10000	0.262	0.268	0.265	2.35591	2.87742	0.0377181	1230	0.95	1.91538	2.33937
	3	LH-HSA	1% BSA-PBS	10000	0.318	0.279	0.2985	2.71613	2.9957	0.250932	1670	0.94	1.62642	1.79383
	4	LH-HSA	1% BSA-PBS	10000	0.554	0.664	0.609	6.05484	7.13548	0.773327	1880	0.98	3.22066	3.79547
	0	LH-Azu	1% BSA-PBS	10000	0.089	0.08	0.0845	0.415054	0.855914	0.031259	334	0.93	1.24268	2.56262
	1	LH-Azu	1% BSA-PBS	10000	0.189	0.19	0.1895	1.54409	2.03871	0.00576166	610	0.96	2.53129	3.34215
	2	LH-Azu	1% BSA-PBS	10000	0.262	0.244	0.253	2.22688	2.61935	0.11203	1330	0.96	1.67435	1.96944
	3	LH-Azu	1% BSA-PBS	10000	0.396	0.421	0.4085	3.89892	4.52258	0.168724	1520	0.95	2.56508	2.97538
	4	LH-Azu	1% BSA-PBS	10000	0.523	0.508	0.5155	5.04946	5.45806	0.103895	2170	0.9	2.32694	2.51524
	0	LH-aSP	1% BSA-PBS	10000	0.093	0.097	0.095	0.527957	1.03871	0.0157188	415	0.95	1.27219	2.50291
	1	LH-aSP	1% BSA-PBS	10000	0.247	0.311	0.279	2.50645	3.33978	0.406556	924	0.99	2.71261	3.61449
	2	LH-aSP	1% BSA-PBS	10000	0.411	0.459	0.435	4.18387	4.93118	0.326449	2500	0.99	1.67355	1.97247
	3	LH-aSP	1% BSA-PBS	10000	0.448	0.542	0.495	4.82903	5.82366	0.648437	3840	0.97	1.25756	1.51658
	4	LH-aSP	1% BSA-PBS	10000	0.773	0.819	0.796	8.06559	8.80215	0.329584	4760	0.99	1.69445	1.84919

## Sheet: LH_2
		Dilution, ng/mL	OD1	OD2	Mean OD-blank	%RSD
		4	2.213	2.138	2.1755	0.0243774
		2	1.762	1.75	1.756	0.00483216
		1	1.237	1.191	1.214	0.0267932
		0.5	0.686	0.812	0.749	0.118953
		0.25	0.466	0.449	0.4575	0.026275
		0.125	0.291	0.315	0.303	0.0560085
		0.0625	0.217	0.19	0.2035	0.0938176
							1,0654	0.09
	Day	Sample name	Solution	Dilution	OD 1	OD 2	LH, mkg/mL	LH, mkg/mL	LH mean, mkg/mL	SD	VCD, x1K/mL	VCD, x1K/mL	% via	% via	Norm. Vol. Prod, pg/cell	Norm. Vol. Prod, pg/cell
	0	LH-NSP	1% BSA-PBS	10000	0.111	0.14	0.197109	0.469307	0.333208	0.192473	476	462	0.88	0.89	0.98594	0.72123
	1	LH-NSP	1% BSA-PBS	10000	0.181	0.175	0.854139	0.797822	0.825981	0.039822	1440	1365	0.97	0.97	0.554043	0.605114
	2	LH-NSP	1% BSA-PBS	10000	0.189	0.179	0.929228	0.835367	0.882298	0.0663701	2740	2810	0.97	0.98	0.304878	0.313985
	3	LH-NSP	1% BSA-PBS	10000	0.299	0.296	1.9617	1.93355	1.94763	0.019911	4580	4427	0.98	0.97	0.422172	0.439942
	4	LH-NSP	1% BSA-PBS	10000	0.291	0.323	1.88662	2.18697	2.03679	0.212384	5030	5140	0.95	0.95	0.434786	0.396263
	0	LH-HSA	1% BSA-PBS	10000	0.153	0.171	0.591327	0.760278	0.675803	0.119466	312	316	0.9	0.91	2.43679	2.13862
	1	LH-HSA	1% BSA-PBS	10000	0.231	0.201	1.32345	1.04186	1.18265	0.19911	751	782	0.93	0.93	1.3873	1.51235
	2	LH-HSA	1% BSA-PBS	10000	0.292	0.289	1.896	1.86784	1.88192	0.019911	1910	2020	0.98	0.98	0.977928	0.931645
	3	LH-HSA	1% BSA-PBS	10000	0.51	0.549	3.94218	4.30824	4.12521	0.258843	2630	2740	0.98	0.97	1.63811	1.50555
	4	LH-HSA	1% BSA-PBS	10000	0.719	0.641	5.90389	5.17177	5.53783	0.517687	5190	4970	0.95	0.94	0.996487	1.11425
	0	LH-Azu	1% BSA-PBS	10000	0.119	0.123	0.272198	0.309743	0.290971	0.026548	292	307	0.92	0.92	1.06076	0.947787
	1	LH-Azu	1% BSA-PBS	10000	0.161	0.156	0.666416	0.619486	0.642951	0.033185	745	710	0.94	0.94	0.831524	0.905565
	2	LH-Azu	1% BSA-PBS	10000	0.218	0.217	1.20143	1.19204	1.19673	0.00663701	1080	1240	0.96	0.97	1.10374	0.965108
	3	LH-Azu	1% BSA-PBS	10000	0.221	0.251	1.22959	1.51117	1.37038	0.19911	1820	1920	0.95	0.94	0.830313	0.713738
	4	LH-Azu	1% BSA-PBS	10000	0.405	0.394	2.95664	2.85339	2.90501	0.0730071	2540	2480	0.92	0.94	1.12338	1.17138
	0	LH-aSP	1% BSA-PBS	10000	0.111	0.125	0.197109	0.328515	0.262812	0.0929181	450	424	0.93	0.93	0.730034	0.61984
	1	LH-aSP	1% BSA-PBS	10000	0.162	0.191	0.675803	0.948001	0.811902	0.192473	1180	1070	0.95	0.95	0.80339	0.758787
	2	LH-aSP	1% BSA-PBS	10000	0.197	0.227	1.00432	1.2859	1.14511	0.19911	2260	2340	0.97	0.98	0.568983	0.489363
	3	LH-aSP	1% BSA-PBS	10000	0.338	0.354	2.32776	2.47794	2.40285	0.106192	4300	4520	0.97	0.96	0.576266	0.531605
	4	LH-aSP	1% BSA-PBS	10000	0.558	0.501	4.39272	3.85771	4.12521	0.378309	6710	6490	0.95	0.94	0.574919	0.635626

## Sheet: TSH_1
		Dilution, ng/mL	OD1	OD2	Mean OD-blank	%RSD
		1	1.621	1.508	1.5645	0.0510726
		0.5	1.031	0.907	0.969	0.0904863
		0.25	0.577	0.561	0.569	0.0198835
		0.125	0.404	0.374	0.389	0.0545327
		0.0625	0.297	0.268	0.2825	0.072588
		0.03125	0.217	0.247	0.232	0.0914362
							1,38	0.12
	Day	Sample name	Solution	Dilution	OD 1	OD 2	Mean OD - blank	TSH, mkg/mL	TSH, mkg/mL	SD	VCD, x1K/mL	VCD, x1K/mL	% via	% via	Norm. Vol. Prod, pg/cell	Norm. Vol. Prod, pg/cell
	0	TSH-NSP	1% BSA-PBS	10000	0.186	0.122	0.478261	0.0144928	0.246377	0.327934	427	449	0.88	0.89	1.12005	0.548723
	1	TSH-NSP	1% BSA-PBS	10000	0.237	0.173	0.847826	0.384058	0.615942	0.327934	1420	1380	0.97	0.97	0.274327	0.446335
	2	TSH-NSP	1% BSA-PBS	10000	0.223	0.198	0.746377	0.565217	0.655797	0.128099	3370	3230	0.97	0.98	0.171278	0.203033
	3	TSH-NSP	1% BSA-PBS	10000	0.275	0.201	1.12319	0.586957	0.855072	0.379173	4860	5350	0.98	0.97	0.114977	0.159827
	4	TSH-NSP	1% BSA-PBS	10000	0.271	0.249	1.0942	0.934783	1.01449	0.112727	6160	6030	0.95	0.95	0.153369	0.168241
	0	TSH-HSA	1% BSA-PBS	10000	0.188	0.183	0.492754	0.456522	0.474638	0.0256198	377	392	0.9	0.91	1.18731	1.21081
	1	TSH-HSA	1% BSA-PBS	10000	0.561	0.583	3.19565	3.35507	3.27536	0.112727	1090	1390	0.93	0.93	2.7057	2.35638
	2	TSH-HSA	1% BSA-PBS	10000	1.351	1.329	8.92029	8.76087	8.84058	0.112727	2960	2530	0.98	0.98	3.19157	3.4943
	3	TSH-HSA	1% BSA-PBS	10000	1.459	1.547	9.7029	10.3406	10.0217	0.450909	3880	3840	0.98	0.97	2.67891	2.60983
	4	TSH-HSA	1% BSA-PBS	10000	1.662	1.716	11.1739	11.5652	11.3696	0.276694	4540	4860	0.95	0.94	2.46068	2.33942
	0	TSH-Azu	1% BSA-PBS	10000	0.161	0.194	0.297101	0.536232	0.416667	0.169091	415	427	0.92	0.92	1.27371	0.9758
	1	TSH-Azu	1% BSA-PBS	10000	0.412	0.426	2.11594	2.21739	2.16667	0.0717355	1520	1250	0.94	0.94	1.601	1.73333
	2	TSH-Azu	1% BSA-PBS	10000	0.707	0.764	4.25362	4.66667	4.46014	0.292066	2840	2650	0.96	0.97	1.70006	1.68307
	3	TSH-Azu	1% BSA-PBS	10000	1.041	1.117	6.67391	7.22464	6.94928	0.389421	5180	5320	0.95	0.94	1.37612	1.30625
	4	TSH-Azu	1% BSA-PBS	10000	1.328	1.288	8.75362	8.46377	8.6087	0.204958	6130	5980	0.92	0.94	1.39781	1.43958
	0	TSH-aSP	1% BSA-PBS	10000	0.286	0.278	1.2029	1.14493	1.17391	0.0409917	385	399	0.93	0.93	2.92073	2.94214
	1	TSH-aSP	1% BSA-PBS	10000	0.432	0.393	2.26087	1.97826	2.11957	0.199835	977	1120	0.95	0.95	1.88675	1.89247
	2	TSH-aSP	1% BSA-PBS	10000	0.877	0.88	5.48551	5.50725	5.49638	0.0153719	2330	2230	0.97	0.98	2.41546	2.46474
	3	TSH-aSP	1% BSA-PBS	10000	1.182	1.203	7.69565	7.84783	7.77174	0.107603	4590	4870	0.97	0.96	1.65916	1.59584
	4	TSH-aSP	1% BSA-PBS	10000	1.209	1.267	7.8913	8.31159	8.10145	0.29719	5970	6360	0.95	0.94	1.34819	1.27381

## Sheet: TSH_2
		Dilution, ng/mL	OD1	OD2	Mean OD-blank	%RSD
		1	1.466	1.409	1.4375	0.0280383
		0.5	0.886	0.852	0.869	0.0276659
		0.25	0.528	0.522	0.525	0.00808122
		0.125	0.335	0.332	0.3335	0.00636078
		0.0625	0.244	0.246	0.245	0.0057723
		0.03125	0.193	0.213	0.203	0.0696657
							1,38	0.12
	Day	Sample name	Solution	Dilution	OD 1	OD 2	TSH, mkg/mL	TSH, mkg/mL	TSH mean, mkg/mL	SD	VCD, x1K/mL	VCD, x1K/mL	% via	% via	Norm. Vol. Prod, pg/cell	Norm. Vol. Prod, pg/cell
	1	TSH-NSP	1% BSA-PBS	10000	0.159	0.156	0.282609	0.26087	0.271739	0.0153719	839	991	0.92	0.89	0.33684	0.263239
	2	TSH-NSP	1% BSA-PBS	10000	0.222	0.155	0.73913	0.253623	0.496377	0.343305	2170	2290	0.92	0.95	0.113732	0.110752
	3	TSH-NSP	1% BSA-PBS	10000	0.161	0.15	0.297101	0.217391	0.257246	0.0563636	3810	4180	0.96	0.97	0.0544158	0.0520075
	4	TSH-NSP	1% BSA-PBS	10000	0.146	0.143	0.188406	0.166667	0.177536	0.0153719	6250	5960	0.97	0.98	0.0273	0.0279642
	6	TSH-NSP	1% BSA-PBS	10000	0.225	0.182	0.76087	0.449275	0.605072	0.22033	5340	5940	0.89	0.89	0.0796588	0.0756356
	1	TSH-HSA	1% BSA-PBS	10000	0.232	0.213	0.811594	0.673913	0.742754	0.0973553	1000	944	0.85	0.86	0.693326	0.713891
	2	TSH-HSA	1% BSA-PBS	10000	0.328	0.312	1.50725	1.3913	1.44928	0.0819834	1950	1730	0.96	0.94	0.756144	0.804222
	3	TSH-HSA	1% BSA-PBS	10000	0.422	0.441	2.18841	2.32609	2.25725	0.0973553	4320	4120	0.94	0.94	0.551205	0.564584
	4	TSH-HSA	1% BSA-PBS	10000	0.641	0.65	3.77536	3.84058	3.80797	0.0461157	5600	5340	0.96	0.96	0.702117	0.71921
	6	TSH-HSA	1% BSA-PBS	10000	1.079	1.097	6.94928	7.07971	7.01449	0.0922313	4660	4170	0.85	0.83	1.60356	1.69777
	1	TSH-Azu	1% BSA-PBS	10000	0.209	0.187	0.644928	0.485507	0.565217	0.112727	962	1040	0.91	0.86	0.485022	0.466834
	2	TSH-Azu	1% BSA-PBS	10000	0.346	0.309	1.63768	1.36957	1.50362	0.189587	2520	2660	0.98	0.95	0.52879	0.514874
	3	TSH-Azu	1% BSA-PBS	10000	0.576	0.397	3.30435	2.00725	2.6558	0.917189	5170	4950	0.98	0.96	0.396689	0.405504
	4	TSH-Azu	1% BSA-PBS	10000	0.458	0.546	2.44928	3.08696	2.76812	0.450909	5240	5670	0.95	0.97	0.565895	0.544437
	6	TSH-Azu	1% BSA-PBS	10000	0.658	0.543	3.89855	3.06522	3.48188	0.589256	4840	4320	0.86	0.84	0.669261	0.709541
	1	TSH-aSP	1% BSA-PBS	10000	0.214	0.217	0.681159	0.702899	0.692029	0.0153719	845	909	0.89	0.92	0.801481	0.773266
	2	TSH-aSP	1% BSA-PBS	10000	0.314	0.286	1.4058	1.2029	1.30435	0.143471	2010	2270	0.95	0.96	0.562102	0.529911
	3	TSH-aSP	1% BSA-PBS	10000	0.462	0.472	2.47826	2.55072	2.51449	0.0512396	4220	4860	0.95	0.94	0.561834	0.52484
	4	TSH-aSP	1% BSA-PBS	10000	0.561	0.565	3.19565	3.22464	3.21014	0.0204958	6390	6880	0.93	0.96	0.486004	0.468697
	6	TSH-aSP	1% BSA-PBS	10000	0.818	0.723	5.05797	4.36957	4.71377	0.486776	3900	4060	0.79	0.82	1.09788	1.07625

## Sheet: CG_1
		Dilution, ng/mL	OD1	OD2	Mean OD-blank	%RSD
		1	2.311	2.138	2.2245	0.0549919
		0.5	1.91	1.732	1.821	0.0691186
		0.25	1.382	1.356	1.369	0.0134293
		0.125	0.793	0.718	0.7555	0.0701959
		0.0625	0.517	0.483	0.5	0.0480833
		0.03125	0.289	0.287	0.288	0.00491046
							4,83	0.08
	Day	Sample name	Solution	Dilution	OD 1	OD 2	Mean OD - blank	CG, mkg/mL	CG, mkg/mL	SD	VCD, x1K/mL	VCD, x1K/mL	% via	% via	Norm. Vol. Prod, pg/cell	Norm. Vol. Prod, pg/cell
	0	hCG-NSP	1% BSA-PBS	20000	0.173	0.205	0.385093	0.517598	0.451346	0.0936953	430	449	0.91	0.93	0	1.00522
	1	hCG-NSP	1% BSA-PBS	20000	0.19	0.268	0.455487	0.778468	0.616977	0.228382	1170	1240	0.92	0.94	0.646031	0.497562
	2	hCG-NSP	1% BSA-PBS	20000	0.484	0.458	1.67288	1.56522	1.61905	0.0761274	2490	2430	0.95	0.94	0.636267	0.666275
	3	hCG-NSP	1% BSA-PBS	20000	0.449	0.46	1.52795	1.5735	1.55072	0.0322078	3920	4360	0.95	0.97	0.380072	0.355671
	4	hCG-NSP	1% BSA-PBS	20000	0.562	0.518	1.99586	1.81366	1.90476	0.128831	4590	5080	0.94	0.95	0.375112	0.374953
	0	hCG-HSA	1% BSA-PBS	20000	0.187	0.167	0.443064	0.360248	0.401656	0.0585596	343	356	0.92	0.94	1.03075	1.12825
	1	hCG-HSA	1% BSA-PBS	20000	0.264	0.314	0.761905	0.968944	0.865424	0.146399	1080	917	0.94	0.94	0.9704	0.943756
	2	hCG-HSA	1% BSA-PBS	20000	0.442	0.389	1.49896	1.2795	1.38923	0.155183	2510	2370	0.93	0.93	0.524387	0.586175
	3	hCG-HSA	1% BSA-PBS	20000	0.898	0.789	3.38716	2.93582	3.16149	0.31915	3750	3960	0.92	0.94	0.761561	0.798356
	4	hCG-HSA	1% BSA-PBS	20000	1.013	0.938	3.86335	3.5528	3.70807	0.219598	5300	5440	0.93	0.93	0.661601	0.681631
	0	hCG-Azu	1% BSA-PBS	20000	0.157	0.169	0.318841	0.36853	0.343685	0.0351357	337	321	0.94	0.94	1.12015	1.07067
	1	hCG-Azu	1% BSA-PBS	20000	0.172	0.173	0.380952	0.385093	0.383023	0.00292798	942	1060	0.96	0.96	0.384708	0.361342
	2	hCG-Azu	1% BSA-PBS	20000	0.225	0.201	0.600414	0.501035	0.550725	0.0702715	2490	2330	0.95	0.96	0.207898	0.236363
	3	hCG-Azu	1% BSA-PBS	20000	0.257	0.264	0.732919	0.761905	0.747412	0.0204958	4120	4010	0.95	0.94	0.18743	0.186387
	4	hCG-Azu	1% BSA-PBS	20000	0.402	0.347	1.33333	1.10559	1.21946	0.161039	5650	5120	0.94	0.94	0.205309	0.238176
	0	hCG-aSP	1% BSA-PBS	20000	0.203	0.182	0.509317	0.42236	0.465839	0.0614875	442	418	0.95	0.94	0.982233	1.11445
	1	hCG-aSP	1% BSA-PBS	20000	0.306	0.312	0.935818	0.960663	0.94824	0.0175679	1380	1490	0.97	0.97	0.669451	0.636403
	2	hCG-aSP	1% BSA-PBS	20000	0.481	0.58	1.66046	2.07039	1.86542	0.28987	3130	3050	0.97	0.97	0.67003	0.611615
	3	hCG-aSP	1% BSA-PBS	20000	0.789	0.665	2.93582	2.42236	2.67909	0.363069	5430	5270	0.98	0.98	0.452778	0.508366
	4	hCG-aSP	1% BSA-PBS	20000	0.759	0.77	2.81159	2.85714	2.83437	0.0322078	5710	5710	0.96	0.96	0.500375	0.496387

## Sheet: CG_2
		Dilution, ng/mL	OD1	OD2	Mean OD-blank	%RSD
		1	1.742	1.713	1.7275	0.0118704
		0.5	1.141	1.086	1.1135	0.0349267
		0.25	0.615	0.596	0.6055	0.0221883
		0.125	0.318	0.311	0.3145	0.0157385
		0.0625	0.198	0.177	0.1875	0.079196
		0.03125	0.144	0.18	0.162	0.157135
							2,09	0.04
	Day	Sample name	Solution	Dilution	OD 1	OD 2	Mean OD - blank	CG, mkg/mL	CG, mkg/mL	SD	VCD, x1K/mL	VCD, x1K/mL	% via	% via	Norm. Vol. Prod, pg/cell	Norm. Vol. Prod, pg/cell
	1	hCG-NSP	1% BSA-PBS	10000	0.184	0.165	0	0.598086	0.643541	0.0642824	959	815	0.87	0.85	0.623656	0.78962
	2	hCG-NSP	1% BSA-PBS	10000	0.388	0.425	0	0	0	0	2380	2160	0.94	0.92	0.8115	0.811847
	3	hCG-NSP	1% BSA-PBS	10000	0.645	0.63	2.89474	2.82297	2.85885	0.0507493	4460	4710	0.93	0.92	0.615696	0.606975
	4	hCG-NSP	1% BSA-PBS	10000	0.938	0.957	4.29665	4.38756	4.34211	0.0642824	5880	6730	0.95	0.97	0.695886	0.645187
	6	hCG-NSP	1% BSA-PBS	10000	1.097	1.139	5.05742	5.25837	5.15789	0.142098	5940	6080	0.9	0.89	0.874937	0.848338
	1	hCG-HSA	1% BSA-PBS	10000	0.201	0.188	0.770335	0.708134	0.739234	0.0439827	615	674	0.87	0.89	1.09873	1.09679
	2	hCG-HSA	1% BSA-PBS	10000	0.303	0.29	1.25837	1.19617	1.22727	0.0439827	2050	2360	0.9	0.91	0.542482	0.520031
	3	hCG-HSA	1% BSA-PBS	10000	0.504	0.473	2.2201	2.07177	2.14593	0.104882	3780	3820	0.94	0.9	0.545203	0.561763
	4	hCG-HSA	1% BSA-PBS	10000	0.931	0.839	4.26316	3.82297	4.04306	0.311262	5400	4920	0.93	0.91	0.740885	0.821761
	6	hCG-HSA	1% BSA-PBS	10000	1.282	1.458	5.94258	6.78469	6.36364	0.595458	5670	5440	0.93	0.88	1.22137	1.16979
	1	hCG-Azu	1% BSA-PBS	10000	0.136	0.144	0.45933	0.497608	0.478469	0.0270663	1060	933	0.93	0.89	0.499355	0.512828
	2	hCG-Azu	1% BSA-PBS	10000	0.185	0.203	0.69378	0.779904	0.736842	0.0608991	2030	2300	0.92	0.94	0.360233	0.320366
	3	hCG-Azu	1% BSA-PBS	10000	0.246	0.245	0.985646	0.980861	0.983254	0.00338329	3250	2970	0.96	0.94	0.315389	0.331062
	4	hCG-Azu	1% BSA-PBS	10000	0.316	0.321	1.32057	1.3445	1.33254	0.0169164	4670	5130	0.94	0.94	0.274387	0.259754
	6	hCG-Azu	1% BSA-PBS	10000	0.336	0.365	1.41627	1.55502	1.48565	0.0981153	5000	5230	0.89	0.91	0.304012	0.284062
	1	hCG-aSP	1% BSA-PBS	10000	0.226	0.247	0.889952	0.990431	0.940191	0.071049	692	674	0.88	0.89	1.45012	1.39494
	2	hCG-aSP	1% BSA-PBS	10000	0.329	0.324	1.38278	1.35885	1.37081	0.0169164	1730	1870	0.94	0.91	0.754918	0.733055
	3	hCG-aSP	1% BSA-PBS	10000	0.534	0.637	2.36364	2.85646	2.61005	0.348478	3430	3410	0.93	0.92	0.835222	0.76541
	4	hCG-aSP	1% BSA-PBS	10000	0.951	0.969	4.35885	4.44498	4.40191	0.0608991	4360	4990	0.93	0.94	0.950797	0.882147
	6	hCG-aSP	1% BSA-PBS	10000	1.167	1.071	5.39234	4.93301	5.16268	0.324795	4770	5170	0.88	0.87	0.992558	0.998584

## Sheet: p-value heterodimer
				Qp	SD	p-value
			NSP-FSH	2.05	0.16
			HSA-FSH	2.15	0.1	0.5317
			Azu-FSH	2.71	0.08	0.0348
			aSP-FSH	2.21	0.11	0.3641
			NSP-LH	0.58	0.05
			HSA-LH	2.54	0.42	0.0225
			Azu-LH	1.78	0.14	0.0076
			aSP-LH	1.19	0.12	0.022
			NSP-hCG	0.62	0.02
			HSA-hCG	0.99	0.06	0.0143
			Azu-hCG	0.26	0.03	0.005
			aSP-hCG	0.75	0.01	0.0145
			NSP-TSH	0.12	0.01
			HSA-TSH	1.56	0.05	0.0006
			Azu-TSH	0.99	0.04	0.0011
			aSP-TSH	0.89	0.05	0.0022

## Sheet: alfa_1
		Dilution, ng/mL	OD1	OD2	Mean OD-blank	%RSD
		50	1.61	1.503	1.4985	0.0486093
		25	0.871	0.821	0.788	0.0417912
		12.5	0.492	0.427	0.4015	0.100026
		6.25	0.254	0.243	0.1905	0.0313005
		3.125	0.173	0.161	0.109	0.0508101
		1.5625	0.117	0.129	0.065	0.068986
			0.06	0.056	0.058
							0.0298	0.0197
			Sample name	Dilution	OD 1	OD 2	mkg/mL	mkg/mL	SD	RE	VCD, x1K/mL	Norm. Vol. Prod, pg/cell	SD
			LH-NSP	200	0.17	0.169	1.14	1.13	0	0	5085	0.223692	0.00106146
			LH-HSA	200	0.231	0.243	1.55	1.63	0.06	0.04	5080	0.31308	0.0178276
			LH-Azu	200	0.305	0.308	2.05	2.07	0.01	0.01	2510	0.81946	0.0116655
			LH-aSP	200	0.196	0.211	1.32	1.42	0.07	0.05	6600	0.206915	0.0147278
			hCG-NSP	200	0.468	0.455	3.14	3.05	0.06	0.02	4590	0.67473	0.0416226
			hCG-HSA	200	0.439	0.417	2.95	2.8	0.1	0.04	5300	0.541925	0.0565741
			hCG-Azu	200	0.394	0.412	2.64	2.76	0.09	0.03	5650	0.47866	0.0408842
			hCG-aSP	200	0.447	0.457	3	3.07	0.05	0.02	5710	0.531219	0.0252075
			TSH-NSP	200	0.896	0.873	6.01	5.86	0.11	0.02	6105	0.972262	0.106113
			TSH-HSA	200	0.498	0.479	3.34	3.21	0.09	0.03	5470	0.599305	0.0540328
			TSH-Azu	200	0.306	0.301	2.05	2.02	0.02	0.01	5455	0.373366	0.00885851
			TSH-aSP	200	0.373	0.379	2.5	2.54	0.03	0.01	6635	0.380293	0.0108274
			FSH-NSP	200	0.476	0.454	3.19	3.05	0.1	0.03	3520	0.886505	0.0925465
			FSH-HSA	200	0.279	0.222	1.87	1.49	0.27	0.16	3140	0.535364	0.144804
			FSH-Azu	200	0.306	0.384	2.05	2.58	0.37	0.16	3670	0.630847	0.233493
			FSH-aSP	200	0.276	0.259	1.85	1.74	0.08	0.04	3730	0.481267	0.0388232

[truncated: 2 more sheets: alfa_2, p-value alfa]
