# Supplementary material for: Increased glycoprotein hormone yield in stably transfected CHO cells using human serum albumin signal peptide for beta-chains
Source: PeerJ. 2025 Feb 14;13:e18908. doi: 10.7717/peerj.18908 (PMC11831970; doi:10.7717/peerj.18908)
Supplement: Supplemental Information 4 [file peerj-13-18908-s004.xlsx]

## Sheet: WB TotalLab Count
		Alfa			Beta
		Free	Total	%	Free	Total	%
FSH	NSP	439296	2.51522e+07	0.00349311	3.2186e+07	2.01724e+07	0.319109
	HSA	673502	3.53636e+07	0.00380901	2.81638e+07	30683228	0.183578
	Azu	3.10835e+06	59530964	0.0104428	2.48463e+07	3.75755e+07	0.132248
	aSP	2.23939e+06	2.26303e+07	0.0197912	1.43169e+07	2.76854e+07	0.103426
LH	NSP	1.22393e+07	4.30738e+06	0.568295	6645409	4718645	0.281666
	HSA	19517070	7.41068e+06	0.526728	1.04297e+07	9.22025e+06	0.226234
	Azu	1.17008e+07	1.08483e+07	0.215716	1.00502e+07	7976582	0.251993
	aSP	1.17008e+07	3.66992e+06	0.637659	1569488	2.82832e+06	0.110984
CG	NSP	2.32956e+06	2.07845e+07	0.0224163	47066790	2.57218e+07	0.365968
	HSA	2.16789e+06	1.43675e+07	0.0301777	4.16566e+07	2.28956e+07	0.363884
	Azu	1.11226e+06	5.50521e+06	0.0404077	4.48523e+07	2.17726e+07	0.412007
	aSP	3.02276e+06	1.21887e+07	0.0495994	4.46793e+07	2.18389e+07	0.409173
TSH	NSP	1.75461e+07	5.30203e+06	0.661865	798567	82337734	0.00969868
	HSA	8.79923e+06	2.94614e+07	0.059734	1.69644e+06	7.38235e+07	0.0229797
	Azu	11518198	2.47705e+07	0.0929993	3.96614e+06	1.31288e+08	0.0302095
	aSP	5.81195e+06	20964230	0.0554463	1509222	1.03438e+08	0.0145906
