# Supplementary material for: Increased glycoprotein hormone yield in stably transfected CHO cells using human serum albumin signal peptide for beta-chains
Source: PeerJ. 2025 Feb 14;13:e18908. doi: 10.7717/peerj.18908 (PMC11831970; doi:10.7717/peerj.18908)
Supplement: Supplemental Information 5 [file peerj-13-18908-s005.xlsx]

## Sheet: b-CG
	1	2	3	4	5	6	7	8
A	25.9075	26.0985	25.9122	25.9509	24.2549	24.3309	24.3683	24.5196
B	28.7357	28.4851	28.63	28.3768	26.7521	26.6415	26.6945	26.8116
C	29.7851	29.6911	29.4501	29.4605	28.68	28.855	29.0058	28.8407
D	30.7124	32.641	32.9462	32.7309	31.1574	31.0778	31.7751	30.933
E	26.0138	26.2255	26.1431	26.0959	27.6447	27.6787	27.6217	28.1051
F	25.0408	25.0139	25.2041	25.0186	25.5109	N/A	25.4498	25.4471
G	24.9934	25.0187	25.2493	25.494	25.5861	25.4959	25.4725	25.424
H	24.1066	23.9855	24.6326	24.1171	24.9447	25.0082	24.8251	25.0656
	Quantity	Log(Quantity)	Mean(Beta)	RE(Beta)	Quantity	Log(Quantity)	Mean(Rab)	RE(Rab)
	40063.7	4.60275	25.9673	0.00345155	16012	4.20445	24.3684	0.00456606
	8012.75	3.90378	28.5569	0.00553431	3202.41	3.50548	26.7249	0.00274488
	1602.55	3.20481	29.5967	0.00566971	640.48	2.80651	28.8454	0.00461577
	320.51	2.50584	32.2576	0.03218	128.1	2.10755	31.2358	0.0118875		Rab1	-3.25	38.05
										Beta	-2.85	39.2
Sample name	Log(Quantity)	Log(Quantity)	Log(Quantity)	Log(Quantity)	Mean	RE	Log(Quantity)	Log(Quantity)	Log(Quantity)	Log(Quantity)	Mean	RE	Copies	SD
NSP	42337.9	35681.3	38140.2	39620.6	38945	0.0715092	1590.89	1552.95	1616.94	1148.07	1477.21	0.149605	26.3638	4.37155
HSA	92924.7	94966.3	81441.7	94609.7	90985.6	0.0706109	7214.15		7533.36	7547.86	7431.79	0.0253803	12.2428	0.918619
Azu	96555.4	94600.8	78517.9	64434.8	83527.2	0.180507	6839.98	7291.42	7413.01	7672.29	7304.18	0.0476228	11.4355	2.13483
aSP	197671	217987	129234	195989	185220	0.208615	10774.5	10300.8	11727.5	9889.77	10673.1	0.0740554	17.3539	3.84162
							ANOVA - Single Factor
							Alpha	0.05
	26.6126	22.9764	23.5878	34.5107
	12.8809		10.8108	12.5346			Groups	Count	Sum	Mean	Variance
	14.1163	12.9743	10.5919	8.39838			Row 1	4	107.688	26.9219	28.1227	14.0816
	18.3462	21.1622	11.0198	19.8174			Row 2	3	36.2263	12.0754	1.22945
							Row 3	4	46.0809	11.5202	6.48722
							Row 4	4	70.3456	17.5864	20.4871
							Source of Variation	SS	df	MS	F	P-value	F critical
							Between Groups	586.115	3	195.372	12.8113	0.000654227	3.58743
							Within Groups	167.75	11	15.25
							Total	753.865	14
							Groups	Pairwise comparisons	Q (0.05)	Difference
							1 and 2	14.8464	8.06798	1
							1 and 3	15.4017		1
							1 and 4	9.3355		1
							2 and 3	0.555235		0
							2 and 4	5.51094		0
							3 and 4	6.06618		0
								Q	4.3

## Sheet: b-FSH
	1	2	3	4	5	6	7
A	23.8226	23.9677	23.8183		18.4179	18.5185	18.2847
B	25.9963	26.1232	26.0788		20.5664	20.3297	20.408
C	28.2977	28.3439	28.2458		23.9436	23.9045	23.7763
D	30.492	30.7426	30.9678		25.9062	25.8272	25.6602
E	25.8678	26.4345	26.2581		24.2951	24.0708	24.1764
F	27.9188	27.8953	28.2317		26.017	25.9751	25.9979
G	27.6563	27.5529	27.769		25.5051	25.4517	25.6166
H	27.4582	27.9402	27.9193		27.1297	27.1523	26.9768
	Quantity	Log(Quantity)	Mean(Beta)	RE(Beta)	Quantity	Log(Quantity)	Mean(Rab)	RE(Rab)
	40063.7	4.60275	23.8695	0.00356088	16012	4.20445	18.407	0.0157545
	8012.75	3.90378	26.0661	0.00247048	3202.41	3.50548	20.4347	0.00919213
	1602.55	3.20481	28.2958	0.00173351	640.48	2.80651	23.8748	0.00452806
	320.51	2.50584	30.7342	0.00774483	128.1	2.10755	25.7979	0.0105607		Rab1	-3.66	33.69
										Beta	-3.27	38.8
Sample name	Log(Quantity)	Log(Quantity)	Log(Quantity)	Log(Quantity)	Mean	RE	Log(Quantity)	Log(Quantity)	Log(Quantity)	Log(Quantity)	Mean	RE	Copies	SD
NSP	9011.59	6046.43	6846.34		7301.45	0.210105	368.901	424.813	397.507		397.074	0.0704113	18.3882	4.07463
HSA	2126.14	2161.65	1705.65		1997.81	0.12696	124.869	128.204	126.378		126.484	0.0132023	15.795	2.01615
Azu	2557.72	2750.95	2362.56		2557.08	0.0759444	172.312	178.203	160.633		170.383	0.0524838	15.0079	1.38545
aSP	2940.59	2094.34	2125.28		2386.74	0.201069	62.0042	61.1314	68.2679		63.8012	0.0610147	37.409	7.86048
							ANOVA - Single Factor
							Alpha	0.05
	24.4282	14.2332	17.2232
	17.027	16.861	13.4964				Groups	Count	Sum	Mean	Variance
	14.8436	15.4372	14.7078				Row 1	3	55.8846	18.6282	27.4652	26.589
	47.4257	34.2596	31.1316				Row 2	3	47.3844	15.7948	3.96898
							Row 3	3	44.9885	14.9962	0.150465
							Row 4	3	112.817	37.6056	74.7714
							Source of Variation	SS	df	MS	F	P-value	F critical
							Between Groups	1026.67	3	342.225	12.8709	0.00198297	4.06618
							Within Groups	212.712	8	26.589
							Total	1239.39	11
							Groups	Pairwise comparisons	Q (0.05)	Difference
							1 and 2	2.8334	10.184	0
							1 and 3	3.63201		0
							1 and 4	18.9774		1
							2 and 3	0.798604		0
							2 and 4	21.8108		1
							3 and 4	22.6094		1
								Q	3.95

## Sheet: b-LH
	1	2	3	4	5	6	7	8
A	26.3959	26.1239	25.8927	25.673	24.662	24.6059	24.8256	24.6565
B	28.7427	28.4951	28.5818	28.633	27.0399	27.1267	27.0808	27.3011
C	29.9952	30.251	29.7517	29.861	28.9885	28.9497	29.3237	29.54
D	32.9651	33.3598	32.9209	32.1238	31.9288	31.4577	31.6522	31.4391
E	26.9846	26.9237	26.957	26.9673	29.2237	28.8964	29.1517	29.1486
F	25.9429	25.9874	26.0173	26.1177	27.8675	27.617	27.6775	28.1013
G	26.7417	26.7564	26.6886	26.9786	28.3892	28.4122	28.5317	29.6036
H	25.5415	25.835	25.6338	26.1512	27.8919	27.7601	27.3851	28.5002
	Quantity	Log(Quantity)	Mean(Beta)	RE(Beta)	Quantity	Log(Quantity)	Mean(Rab)	RE(Rab)
	40063.7	4.60275	26.0214	0.0119229	80060.2	4.90342	24.6875	0.00386754
	8012.75	3.90378	28.6132	0.00361519	16012	4.20445	27.1371	0.00423457
	1602.55	3.20481	29.9647	0.00718447	3202.41	3.50548	29.2005	0.00965263
	320.51	2.50584	32.8424	0.0157747	640.48	2.80651	31.6194	0.00719921		Rab1	-3.25	40.7
										Beta	-2.85	40.4
Sample name	Log(Quantity)	Log(Quantity)	Log(Quantity)	Log(Quantity)	Mean	RE	Log(Quantity)	Log(Quantity)	Log(Quantity)	Log(Quantity)	Mean	RE	Copies	SD
NSP	50949.8	53519.1	52102.1	51668.7	52059.9	0.0207962	3397.58	4284.36	3575.32	3583.17	3710.11	0.105741	14.0319	1.51218
HSA	118212	114037	111314	102647	111552	0.0589833	8881.18	10605.5	10160.5	7525.33	9293.14	0.149227	12.0037	1.92613
Azu	61998.9	61267.4	64717.5	51199.5	59795.8	0.099004	6136.63	6037.36	5547.62	2595.85	5079.37	0.329879	11.7723	4.05456
aSP	163501	128983	151743	99903.3	136032	0.129003	8728.77	9582.83	12499.3	5672.71	9120.9	0.30797	14.9144	4.97986
							ANOVA - Single Factor
							Alpha	0.05
	14.9959	12.4917	14.5727	14.4199
	13.3103	10.7526	10.9555	13.6402			Groups	Count	Sum	Mean	Variance
	10.1031	10.148	11.6658	19.7236			Row 1	4	56.4802	14.1201	1.23778	8.70731
	18.7312	13.4598	12.1401	17.6112			Row 2	4	48.6587	12.1647	2.31526
							Row 3	4	51.6405	12.9101	21.1599
							Row 4	4	61.9423	15.4856	10.1163
							Source of Variation	SS	df	MS	F	P-value	F critical
							Between Groups	25.3692	3	8.45641	0.971185	0.438282	3.49029
							Within Groups	104.488	12	8.70731
							Total	129.857	15

## Sheet: b-TSH
	1	2	3	4	5	6	7
A	23.6033	23.4639	23.6578		17.8476	17.8893	17.8956
B	25.906	25.8816	25.611		19.8753	19.9114	19.6272
C	27.7978	27.9143	27.9252		22.3948	22.4478	21.5243
D	30.0613	29.934	30.0974		24.889	24.6269	24.3846
E	23.0904	23.0145	23.0055		23.6869	23.916	23.5003
F	24.2132	24.0303	24.2253		24.8812	24.7423	24.3566
G	24.0442	24.0362	24.0705		25.1324	24.7535	24.6538
H	21.9732	22.3026	22.5706		22.9966	22.2602	22.949
	Quantity	Log(Quantity)	Mean(Beta)	RE(Beta)	Quantity	Log(Quantity)	Mean(Rab)	RE(Rab)
	8012.75	3.90378	23.575	0.00424216	80060.2	4.90342	17.8775	0.00260977
	1602.55	3.20481	25.7995	0.00634732	16012	4.20445	19.8046	0.00551889
	320.51	2.50584	27.8791	0.0025332	3202.41	3.50548	22.1223	0.000811364
	64.1	1.80686	30.0309	0.00285838	640.48	2.80651	24.6335	0.0121468		Rab1	-3.23	33.6
										Beta	-3.07	35.6
Sample name	Log(Quantity)	Log(Quantity)	Log(Quantity)	Log(Quantity)	Mean	RE	Log(Quantity)	Log(Quantity)	Log(Quantity)	Log(Quantity)	Mean	RE	Copies	SD
NSP	11879.1	12575	12660.6		12371.6	0.0346479	1172.42	995.719	1339.14		1169.09	0.146897	10.5822	1.59714
HSA	5117.44	5870.13	5071.11		5352.89	0.0837945	500.41	552.494	727.334		593.412	0.200311	9.02053	1.95864
Azu	5809.01	5844.17	5695.65		5782.94	0.0134213	418.366	548.076	588.459		518.3	0.171464	11.1575	1.91897
aSP	27460.5	21449.1	17543.6		22151.1	0.225522	1917.68	3241.73	1983.89		2381.1	0.313326	9.30287	3.59135
							ANOVA - Single Factor
							Alpha	0.05
	10.1321	12.6291	9.45426
	10.2265	10.6248	6.97219				Groups	Count	Sum	Mean	Variance
	13.885	10.6631	9.67892				Row 1	3	32.2154	10.7385	2.79559	6.84132
	14.3196	6.61657	8.84303				Row 2	3	27.8235	9.27449	4.01512
							Row 3	3	34.227	11.409	4.8401
							Row 4	3	29.7792	9.9264	15.7145
							Source of Variation	SS	df	MS	F	P-value	F critical
							Between Groups	7.82359	3	2.60786	0.381193	0.769432	4.06618
							Within Groups	54.7306	8	6.84132
							Total	62.5541	11

## Sheet: a-hCG
	1	2	3	4	5	6	7	8
A	25.3667	25.1928	24.6761	25.7057	25.7187	26.0022	26.0713	25.8726
B	27.9773	27.5907	27.6554	27.7759	25.1155	25.2485	25.4474	25.4816
C	29.0318	29.2591	28.9558	28.8823	24.7371	25.0292	25.3441	25.227
D	31.8721	30.9027	31.212	30.7579	24.5828	24.716	24.8174	24.9614
E	23.856	23.798	23.7256	23.6528	30.3631	30.2016	30.3241	30.1886
F	26.1962	26.2442	25.9981	26.0271	28.7501	28.6966	28.4567	28.4219
G	28.6187	28.4186	28.5115	28.3057	27.766	27.9448	27.8702	27.9256
H	N/A	31.1335	30.8909	30.6381	26.5924	27.1111	27.1493	26.9493
	Quantity	Log(Quantity)	Mean(A)	RE(A)	Quantity	Log(Quantity)	Mean(Rab)	RE(Rab)
	40063.7	4.60275	25.2353	0.0170151	80060.2	4.90342	23.7581	0.00371051
	8012.75	3.90378	27.7498	0.00612484	16012	4.20445	26.1164	0.00467259
	1602.55	3.20481	29.0322	0.00561701	3202.41	3.50548	28.4636	0.00468382
	320.51	2.50584	31.1862	0.0158705	640.48	2.80651	30.8875	0.00801934		Rab1	-3.29	39.92
										Beta	-2.73	38.03
Sample name	Log(Quantity)	Log(Quantity)	Log(Quantity)	Log(Quantity)	Mean	RE	Log(Quantity)	Log(Quantity)	Log(Quantity)	Log(Quantity)	Mean	RE	Copies	SD
NSP	32332.6	25455.8	24015.3	28397.3	27550.3	0.133318	803.235	899.348	825.457	907.578	858.904	0.0609534	32.0761	4.70207
HSA	53775.5	48070.9	40645.6	39490.4	45495.6	0.147323	2483.79	2578.54	3050	3125.04	2809.34	0.115678	16.1944	3.03339
Azu	73991.9	57838.3	44347.2	48950.8	58725.8	0.222511	4945.78	4363.94	4597.97	4422.83	4582.63	0.0571083	12.8149	2.94386
aSP	84279.9	75324.2	69148.5	61241.4	72498.5	0.134378	11244.4	7821.12	7615.18	8759.37	8860.01	0.188008	8.18267	1.89097
							ANOVA - Single Factor
							Alpha	0.05
		28.3047	29.0933	31.2891
	21.6505	18.6427	13.3264	12.6368			Groups	Count	Sum	Mean	Variance
	14.9606	13.2537	9.64495	11.0678			Row 1	3	88.6872	29.5624	2.3917	7.04592
	7.49529	9.63087	9.08036	6.99153			Row 2	4	66.2564	16.5641	18.6996
							Row 3	4	48.927	12.2317	5.51249
							Row 4	4	33.1981	8.29951	1.57994
							Source of Variation	SS	df	MS	F	P-value	F critical
							Between Groups	846.505	3	282.168	37.7784	4.37578e-06	3.58743
							Within Groups	82.1594	11	7.46903
							Total	928.664	14
							Groups	Pairwise comparisons	Q (0.05)	Difference
							1 and 2	12.9983	5.57427	1
							1 and 3	17.3306		1
							1 and 4	21.2629		1
							2 and 3	4.33236		0
							2 and 4	8.26459		1
							3 and 4	3.93224		0
									4.2

## Sheet: a-FSH
	1	2	3	4	5	6	7	8
A	26.6821	26.6569	26.7059	26.6343	24.741	24.8065	24.4106	24.6908
B	29.2613	29.07	28.8593	29.4313	25.9068	26.1362	26.0802	26.0237
C	30.9632	30.8515	30.4817	29.8185	25.5725	25.5552	25.3299	25.3027
D	33.8308	32.3929	32.5061	32.6953	26.9422	26.8605	26.9451	26.7347
E	25.1047	25.2781	25.1168	25.1845	28.0898	28.1361	27.9307	27.7506
F	27.424	27.482	27.5712	27.6959	29.4529	29.5137	29.6102	29.0154
G	29.8749	29.701	29.4148	29.9847	29.2141	29.2803	28.7252	28.6042
H	32.5525	32.1337	32.3107	32.7884	29.0946	28.7443	28.2051	28.5924
	Quantity	Log(Quantity)	Mean(A)	RE(A)	Quantity	Log(Quantity)	Mean(Rab)	RE(Rab)
	40063.7	4.60275	26.6698	0.00116294	80060.2	4.90342	25.171	0.00316106
	8012.75	3.90378	29.1555	0.00845486	16012	4.20445	27.5433	0.00429831
	1602.55	3.20481	30.5287	0.0169104	3202.41	3.50548	29.7439	0.00835653
	320.51	2.50584	32.8563	0.0201346	640.48	2.80651	32.4463	0.00879642		Rab1	-3.43	41.98
										Beta	-2.85	39.9
Sample name	Log(Quantity)	Log(Quantity)	Log(Quantity)	Log(Quantity)	Mean	RE	Log(Quantity)	Log(Quantity)	Log(Quantity)	Log(Quantity)	Mean	RE	Copies	SD
NSP	208428	197687	272200	217043	223840	0.148313	11210.2	10867.2	12473.6	14077.2	12157	0.119651	18.4123	3.50866
HSA	81261.1	67514.5	70639	73940.4	73338.7	0.0804129	4489.53	4310	4039.76	6022.16	4715.37	0.0480142	15.5531	1.45666
Azu	106459	107962	129514	132390	114645	0.120116	5270.49	5041.29	7317.63	7936.98	6391.6	0.0685191	17.9368	2.4804
aSP	35205.3	37605.7	35121.3	41629.2	37390.4	0.0816153	5710.38	7224.39	10375.7	7999.96	7827.61	0.209766	4.77673	1.07517
							ANOVA - Single Factor
							Alpha	0.05
	18.5928	18.1912	21.8221	15.418
	18.1001	15.6646	17.4859	12.278			Groups	Count	Sum	Mean	Variance
	20.1991	21.4156	17.6989	16.6801			Row 1	4	74.0241	18.506	6.87958	4.96367
	6.16514	5.20538	3.38495	5.20367			Row 2	4	63.5287	15.8822	6.8428
							Row 3	4	75.9937	18.9984	4.78257
							Row 4	4	19.9591	4.98979	1.34972
							Source of Variation	SS	df	MS	F	P-value	F critical
							Between Groups	514.413	3	171.471	34.5452	3.49586e-06	3.49029
							Within Groups	59.564	12	4.96367
							Total	573.977	15
							Groups	Pairwise comparisons	Q (0.05)	Difference
							1 and 2	2.62385	4.67865	0
							1 and 3	0.492401		0
							1 and 4	13.5162		1
							2 and 3	3.11625		0
							2 and 4	10.8924		1
							3 and 4	14.0086		1
									4.2

## Sheet: a-TSH
	1	2	3	4	5	6	7	8
A	26.6821	26.6569	26.7059	26.6343	24.9684	24.9434	24.9078	24.9706
B	29.2613	29.07	28.8593	29.4313	24.7656	25.1032	25.0762	24.9386
C	30.9632	30.8515	30.4817	29.8185	25.0344	25.2076	24.9621	24.8873
D	33.8308	32.3929	32.5061	32.6953	25.1899	25.4517	24.9728	25.171
E	25.1047	25.2781	25.1168	25.1845	27.7426	27.661	27.5415	27.1857
F	27.424	27.482	27.5712	27.6959	27.9162	27.763	27.7649	27.4595
G	29.8749	29.701	29.4148	29.9847	27.6863	27.5327	27.4946	27.2839
H	32.5525	32.1337	32.3107	32.7884	27.379	27.9182	27.698	N/A
	Quantity	Log(Quantity)	Mean(A)	RE(A)	Quantity	Log(Quantity)	Mean(Rab)	RE(Rab)
	40063.7	4.60275	26.6698	0.00116294	80060.2	4.90342	25.171	0.00316106
	8012.75	3.90378	29.1555	0.00845486	16012	4.20445	27.5433	0.00429831
	1602.55	3.20481	30.5287	0.0169104	3202.41	3.50548	29.7439	0.00835653
	320.51	2.50584	32.8563	0.0201346	640.48	2.80651	32.4463	0.00879642		Rab1	-3.43	41.98
										Beta	-2.85	39.94
Sample name	Log(Quantity)	Log(Quantity)	Log(Quantity)	Log(Quantity)	Mean	RE	Log(Quantity)	Log(Quantity)	Log(Quantity)	Log(Quantity)	Mean	RE	Copies	SD
NSP	179137	182793	188126	178822	182220	0.0237667	14152.7	14949.5	16198.2	20569.2	16467.4	0.173748	11.0655	1.94051
HSA	211032	160654	164204	183513	179851	0.128366	12595.7	13960.6	13943	17115.6	14403.7	0.133133	12.4864	2.30921
Azu	169841	147657	180051	191277	165850	0.111913	14697.8	16294.5	16716.7	19256	16741.2	0.112807	9.90666	1.57419
aSP	149784	121230	178510	152092	150404	0.155659	18065.6	12579	14583.4		15076	0.184151	9.97638	2.40555
							ANOVA - Single Factor
							Alpha	0.05
	12.6574	12.2274	11.614	8.69368
	16.7542	11.5076	11.7768	10.7219			Groups	Count	Sum	Mean	Variance
	11.5555	9.06177	10.7707	9.93337			Row 1	4	45.1925	11.2981	3.19807	3.98106
	8.29112	9.63745	12.2406				Row 2	4	50.7606	12.6902	7.54095
							Row 3	4	41.3214	10.3304	1.15398
							Row 4	3	30.1692	10.0564	4.03126
							Source of Variation	SS	df	MS	F	P-value	F critical
							Between Groups	15.8488	3	5.28294	1.32854	0.31482	3.58743
							Within Groups	43.7415	11	3.9765
							Total	59.5903	14

## Sheet: a-LH
	1	2	3	4	5	6	7	8
A	25.3667	25.1928	24.6761	25.7057	27.1989	27.3022	27.3447	27.4555
B	27.9773	27.5907	27.6554	27.7759	25.553	25.7839	25.7752	25.9469
C	29.0318	29.2591	28.9558	28.8823	27.116	27.414	27.4724	27.2978
D	31.8721	30.9027	31.212	30.7579	26.5426	26.7825	26.7213	26.9024
E	23.856	23.798	23.7256	23.6528	29.1307	29.5342	29.7856	29.6071
F	26.1962	26.2442	25.9981	26.0271	28.8439	28.7663	28.7275	28.791
G	28.6187	28.4186	28.5115	28.3057	30.837	31.3327	30.7516	30.9179
H	29.8869	31.1335	30.8909	30.6381	28.6832	28.5335	28.8928	29.4239
	Quantity	Log(Quantity)	Mean(A)	RE(A)	Quantity	Log(Quantity)	Mean(Rab)	RE(Rab)
	40063.7	4.60275	25.2353	0.0170151	80060.2	4.90342	23.7581	0.00371051
	8012.75	3.90378	27.7498	0.00612484	16012	4.20445	26.1164	0.00467259
	1602.55	3.20481	29.0322	0.00561701	3202.41	3.50548	28.4636	0.00468382
	320.51	2.50584	31.1862	0.0158705	640.48	2.80651	30.6374	0.0176133		Rab1	-3.29	39.9
										Beta	-2.73	38
Sample name	Log(Quantity)	Log(Quantity)	Log(Quantity)	Log(Quantity)	Mean	RE	Log(Quantity)	Log(Quantity)	Log(Quantity)	Log(Quantity)	Mean	RE	Copies	SD
NSP	9045.94	8290.73	7998.8	7285.69	8155.29	0.0893332	1876.53	1414.78	1186.57	1344.42	1455.58	0.203642	5.6028	1.24592
HSA	36253.5	29838.5	30056.3	26004.2	30538.1	0.138857	2293.67	2421.67	2488.26	2380.1	2395.92	0.0339896	12.7459	1.8221
Azu	9700.79	7545.17	7182.32	8321.63	8142.76	0.136956	568.475	401.837	603.498	537.187	527.749	0.0888463	15.4292	2.51882
aSP	15734.7	12852.1	13532.4	11616.1	13433.8	0.128546	2566.68	2850.16	2216.37	1528.41	2290.41	0.249002	5.86526	1.64359
							ANOVA - Single Factor
							Alpha	0.05
	4.82056	5.86009	6.7411	5.41921
	15.8059	12.3215	12.0792	10.9257			Groups	Count	Sum	Mean	Variance
	17.0646	18.7767	11.9012	15.4911			Row 1	4	22.841	5.71024	0.653782	3.81616
	6.13036	4.50926	6.10565	7.60011			Row 2	4	51.1323	12.7831	4.43192
							Row 3	4	63.2336	15.8084	8.58528
							Row 4	4	24.3454	6.08635	1.59366
							Source of Variation	SS	df	MS	F	P-value	F critical
							Between Groups	300.656	3	100.219	26.2616	1.47277e-05	3.49029
							Within Groups	45.7939	12	3.81616
							Total	346.45	15
							Groups	Pairwise comparisons	Q (0.05)	Difference
							1 and 2	7.07283	4.10235	1
							1 and 3	10.0981		1
							1 and 4	0.376105		0
							2 and 3	3.02532		0
							2 and 4	6.69672		1
							3 and 4	9.72204		1
									4.2
